# Supplementary material for: An observational constraint on stomatal function in forests: evaluating coupled carbon and water vapor exchange with carbon isotopes in the Community Land Model (CLM 4.5)
Source: Copernicus journal article supplement (doi:10.5194/bg-2016-73), 2016-03-22
Supplement: Supplementary file 1 [file bg-2016-73-supplement.pdf]

## Supplement

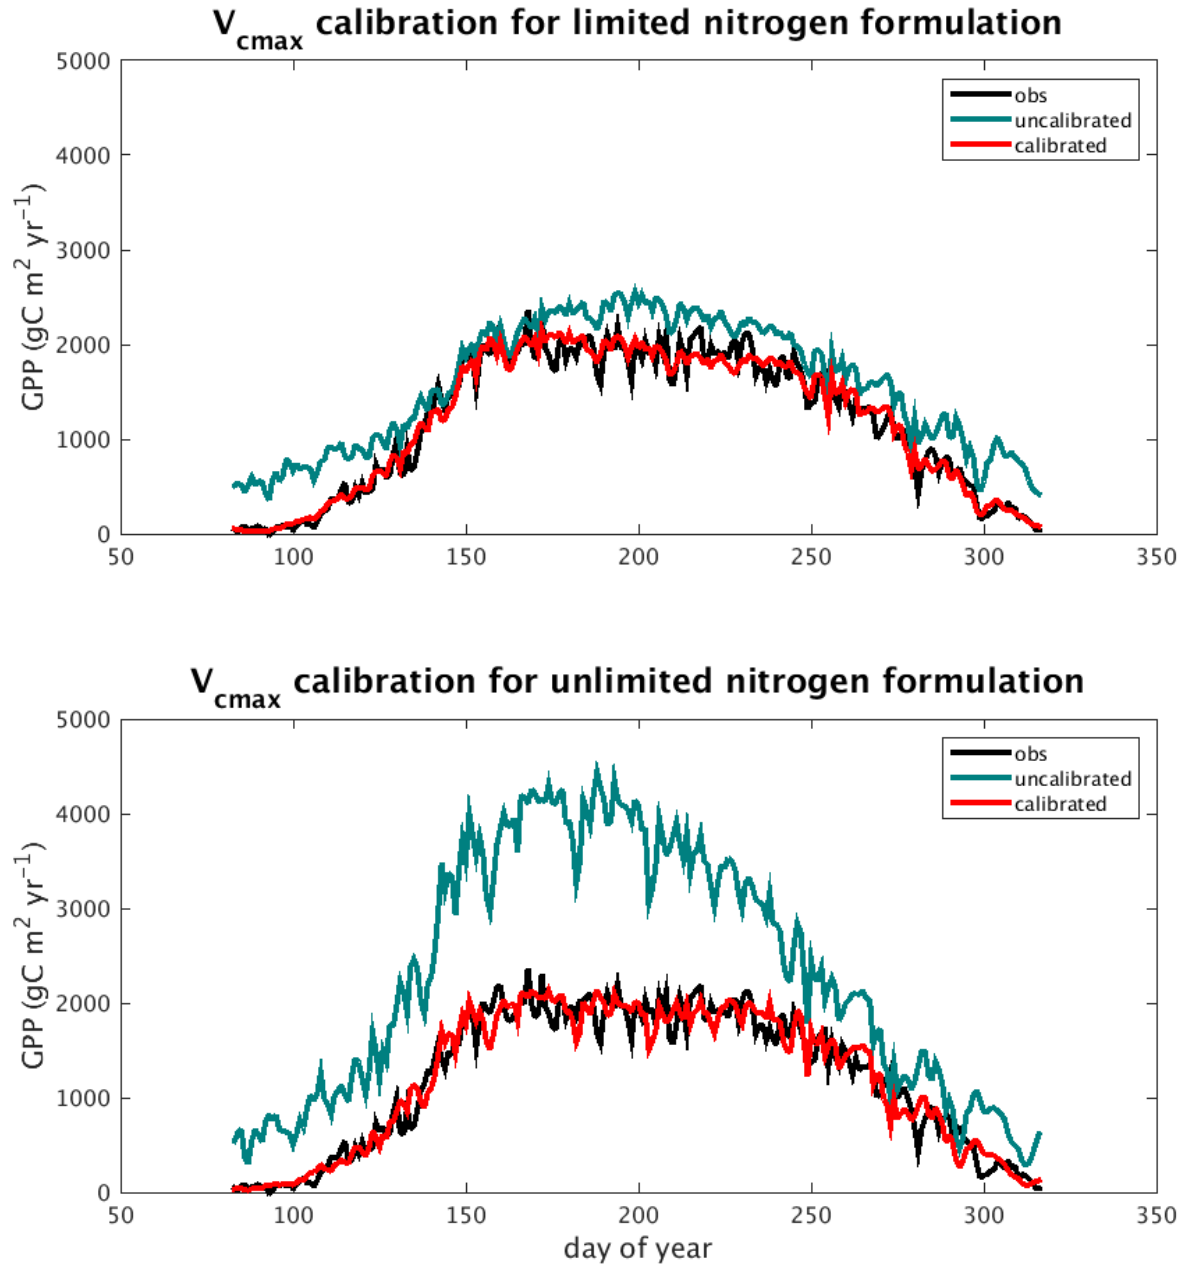

Figure S1. Calibrated and uncalibrated simulations for the *limited nitrogen* formulation (top panel) and *unlimited nitrogen* formulation (bottom panel). The *limited nitrogen* calibrated run used the  $V_{cmax25}$  calibration parameter: (equation (A1))  $f_{df} = (1.09 * 10^{-12})x^6 - (1.351 * 10^{-9})x^5 + (6.722 * 10^{-7})x^4 - (1.709 * 10^{-4})x^3 + (2.324 * 10^{-2})x^2 - (1.584)x + 42.31$ , where  $x$  represents the day of the year. The *unlimited nitrogen* calibrated run used the  $V_{cmax25}$  calibration parameter: (equation (A2))  $f_{df} = (5.01 * 10^{-13})x^6 - (6.258 * 10^{-10})x^5 + (3.105 * 10^{-7})x^4 - (7.803 * 10^{-5})x^3 + (1.041 * 10^{-2})x^2 - (0.690)x + 17.93$ .

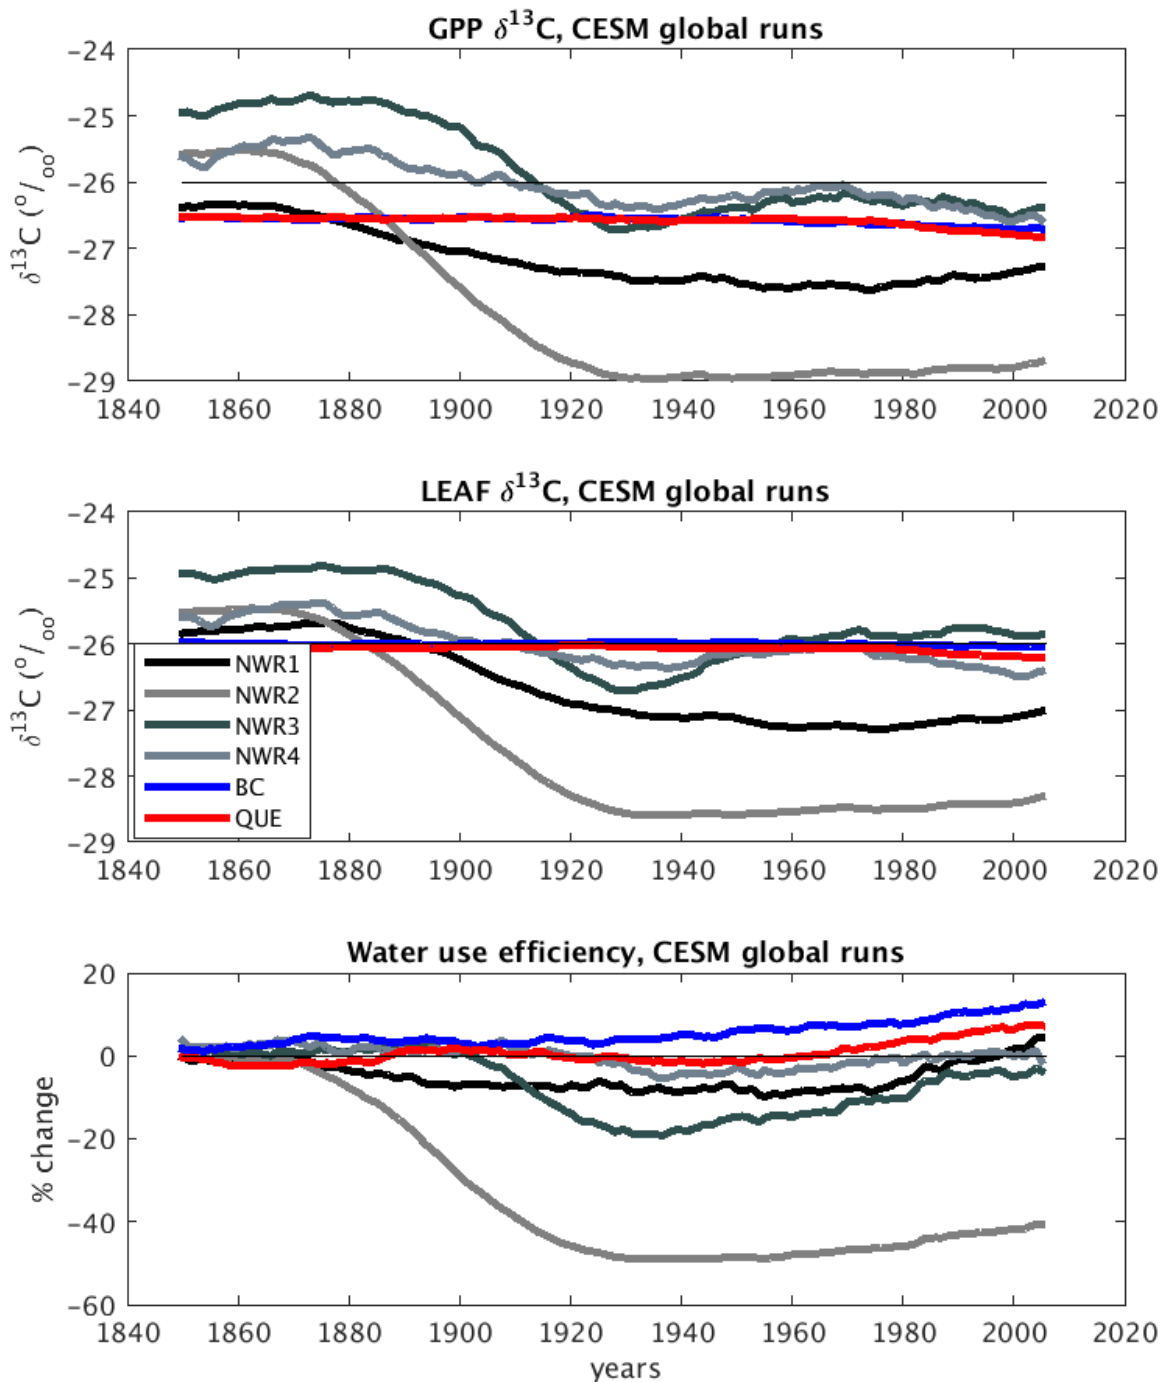

Figure S2. Global CESM simulation output based upon fully coupled isotope enabled experiment with CAM5 and CLM45BGC (courtesy Keith Lindsay, NCAR). NWR1 represents model output from a grid cell that is collocated with coordinates of the site Niwot Ridge (40.0329° N, -105.5464° W), NWR2, NWR3 and NWR4 represent grid cells adjacent to NWR1 and closest to the Niwot Ridge spatial coordinates. QUE and BC represent grid cells of coniferous forest located in Quebec (49.5° N, -70.0° W) and British Columbia (52.3° N, -122.5° W) respectively.

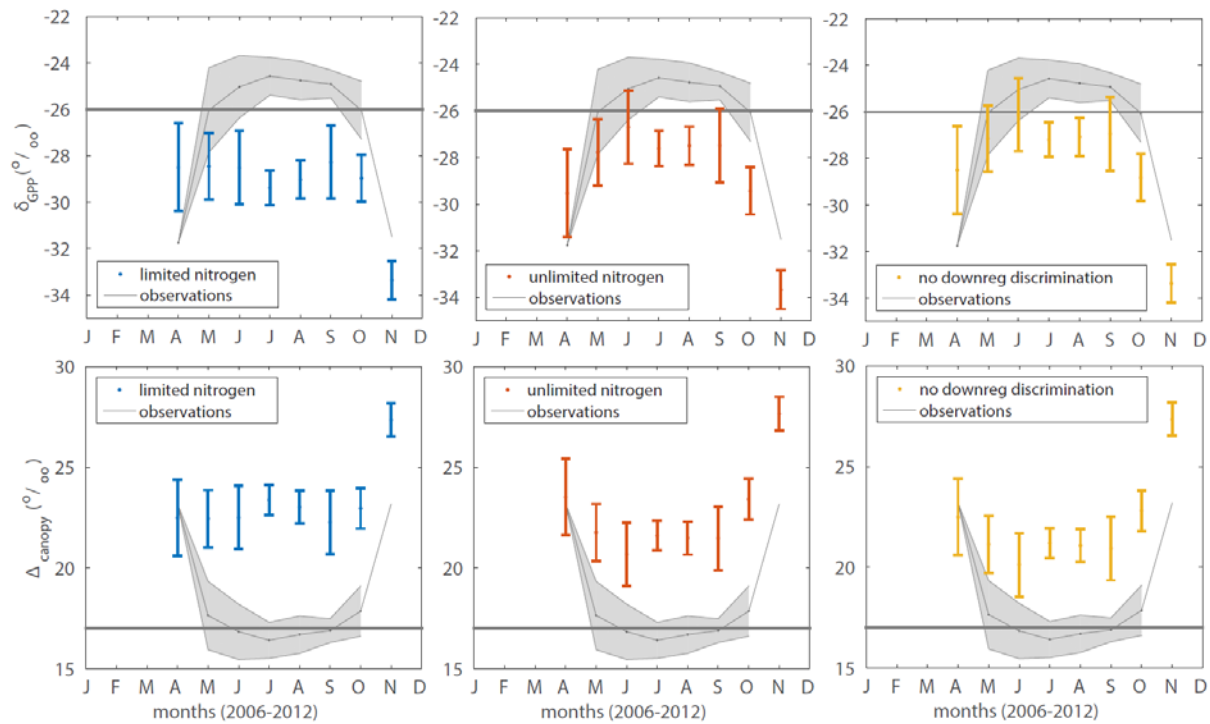

Figure S3. The seasonal photosynthetic discrimination pattern as shown through  $\delta_{GPP}$  (top row) and  $\Delta_{canopy}$  (bottom row). Colored uncertainty bars represent 95% confidence bounds of simulated monthly average values from 2006-2012. Gray-shaded observation bounds represent 95% confidence intervals of ‘observed’ monthly average values based upon isotopic mixing model using Lasslop et al., (2010) partitioning of net ecosystem exchange flux (Bowling et al. 2014). Horizontal lines represent  $\delta^{13}C$  of -26 ‰ (top row) and 17 ‰ (bottom row) and are included for reference.

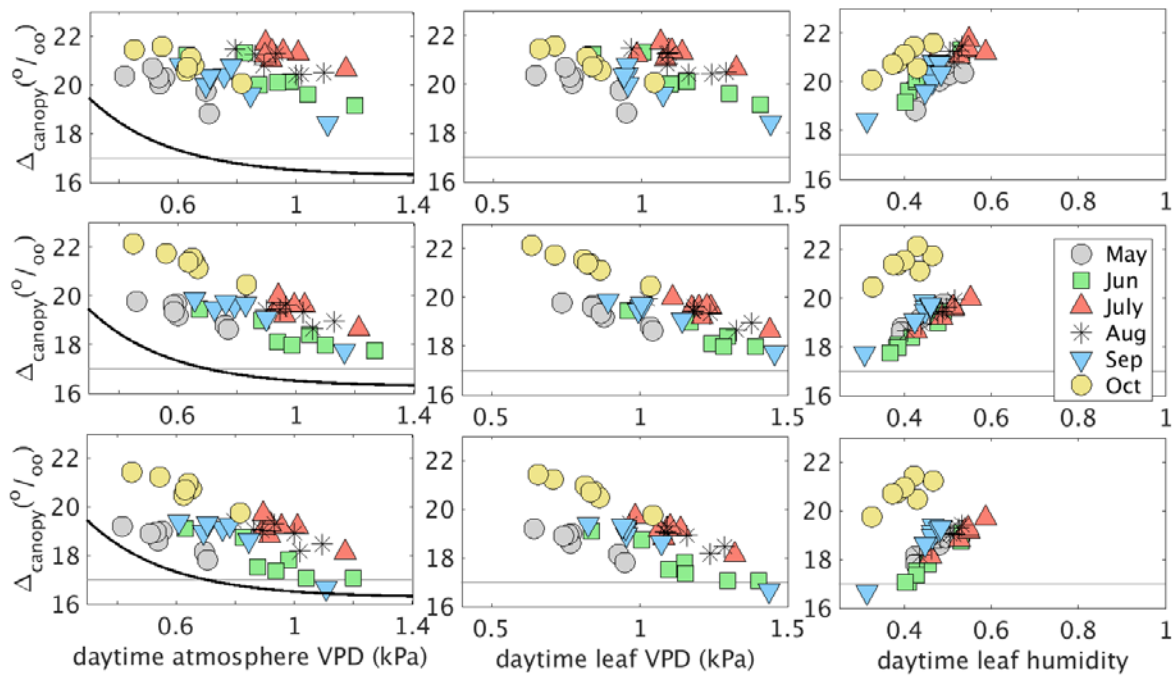

Figure S4. Relationship between monthly average photosynthetic discrimination and monthly average daytime atmosphere VPD (1<sup>st</sup> column), leaf VPD (2<sup>nd</sup> column) and leaf humidity (3<sup>rd</sup> column) from 2006-2012. The rows represent the *limited nitrogen* (row 1), *unlimited nitrogen* (row 2), and *no downregulation discrimination* (row 3) simulations. The black line in the 1<sup>st</sup> column is based on exponential fitted line from observed relationship at Niwot Ridge (Bowling et al. 2014). The horizontal lines represent  $\delta^{13}\text{C}$  of 17 ‰ and are included for reference.

## Supplement continued

### Derivation of relationship between iWUE and $c_i/c_a$ (discrimination)

Starting with Equation (9) and ending with Equation (17) from main text:

$$c_i^* = c_a - A_n (1 - f_{dreg}) P_{atm} \frac{(1.4g_s) + (1.6g_b)}{g_b g_s}$$

Assume  $f_{dreg} = 0$  for simplicity:

$$c_i^* = c_a - A_n P_{atm} \frac{(1.4g_s) + (1.6g_b)}{g_b g_s}$$

$$\frac{c_i^*}{P_{atm}} = \frac{c_a}{P_{atm}} - A_n \frac{(1.4g_s) + (1.6g_b)}{g_b g_s}$$

$$c_{i \text{ mole fraction}}^* = c_{a \text{ mole fraction}} - A_n \frac{(1.4g_s) + (1.6g_b)}{g_b g_s}$$

$$\frac{c_{i \text{ mole fraction}}^*}{c_{a \text{ mole fraction}}} = 1 - \frac{A_n}{c_{a \text{ mole fraction}}} \frac{(1.4g_s) + (1.6g_b)}{g_b g_s}$$

Removing 'mole fraction' subscript for simplicity:

$$\frac{c_i^*}{c_a} = 1 - \frac{A_n}{c_a} \frac{(1.4g_s) + (1.6g_b)}{g_b g_s}$$

$$\frac{c_i^*}{c_a} = 1 - \frac{A_n}{c_a} \left( \frac{1.4}{g_b} + \frac{1.6}{g_s} \right)$$

Because  $g_b \gg g_s$ , therefore,  $\frac{1.4}{g_b} \ll \frac{1.6}{g_s}$

$$\frac{c_i^*}{c_a} \cong 1 - \frac{A_n}{c_a} \left( \frac{1.6}{g_s} \right)$$

$$\frac{c_i^*}{c_a} \cong 1 - \frac{1.6}{c_a} iWUE$$
